# Supplementary material
Source: publisher figshare collection journal article supplement (https://sage.figshare.com/ndownloader/files/37484165)
Supplement: Supplementary file 1 [file 37484165]

**Supplemental Figure 1. PRISMA 2020 flow diagram demonstrating search results and study selection**


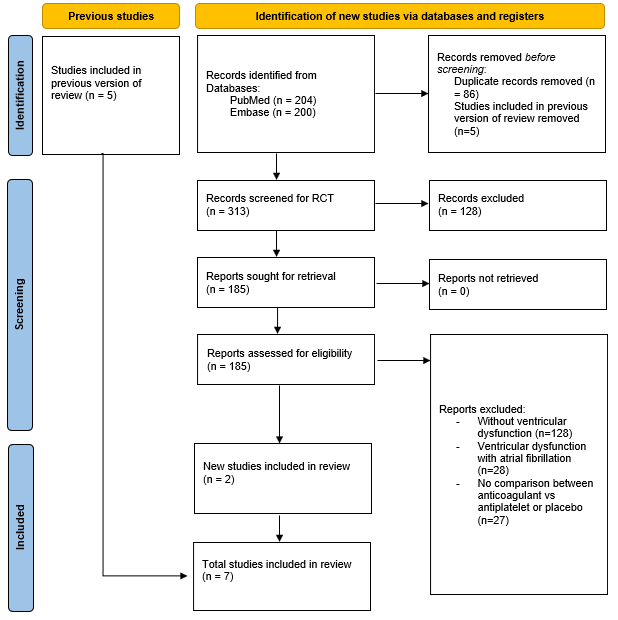


**Supplemental Figure 2. Risk of bias assessment of included studies using Risk of Bias for randomized trials (RoB 2).**


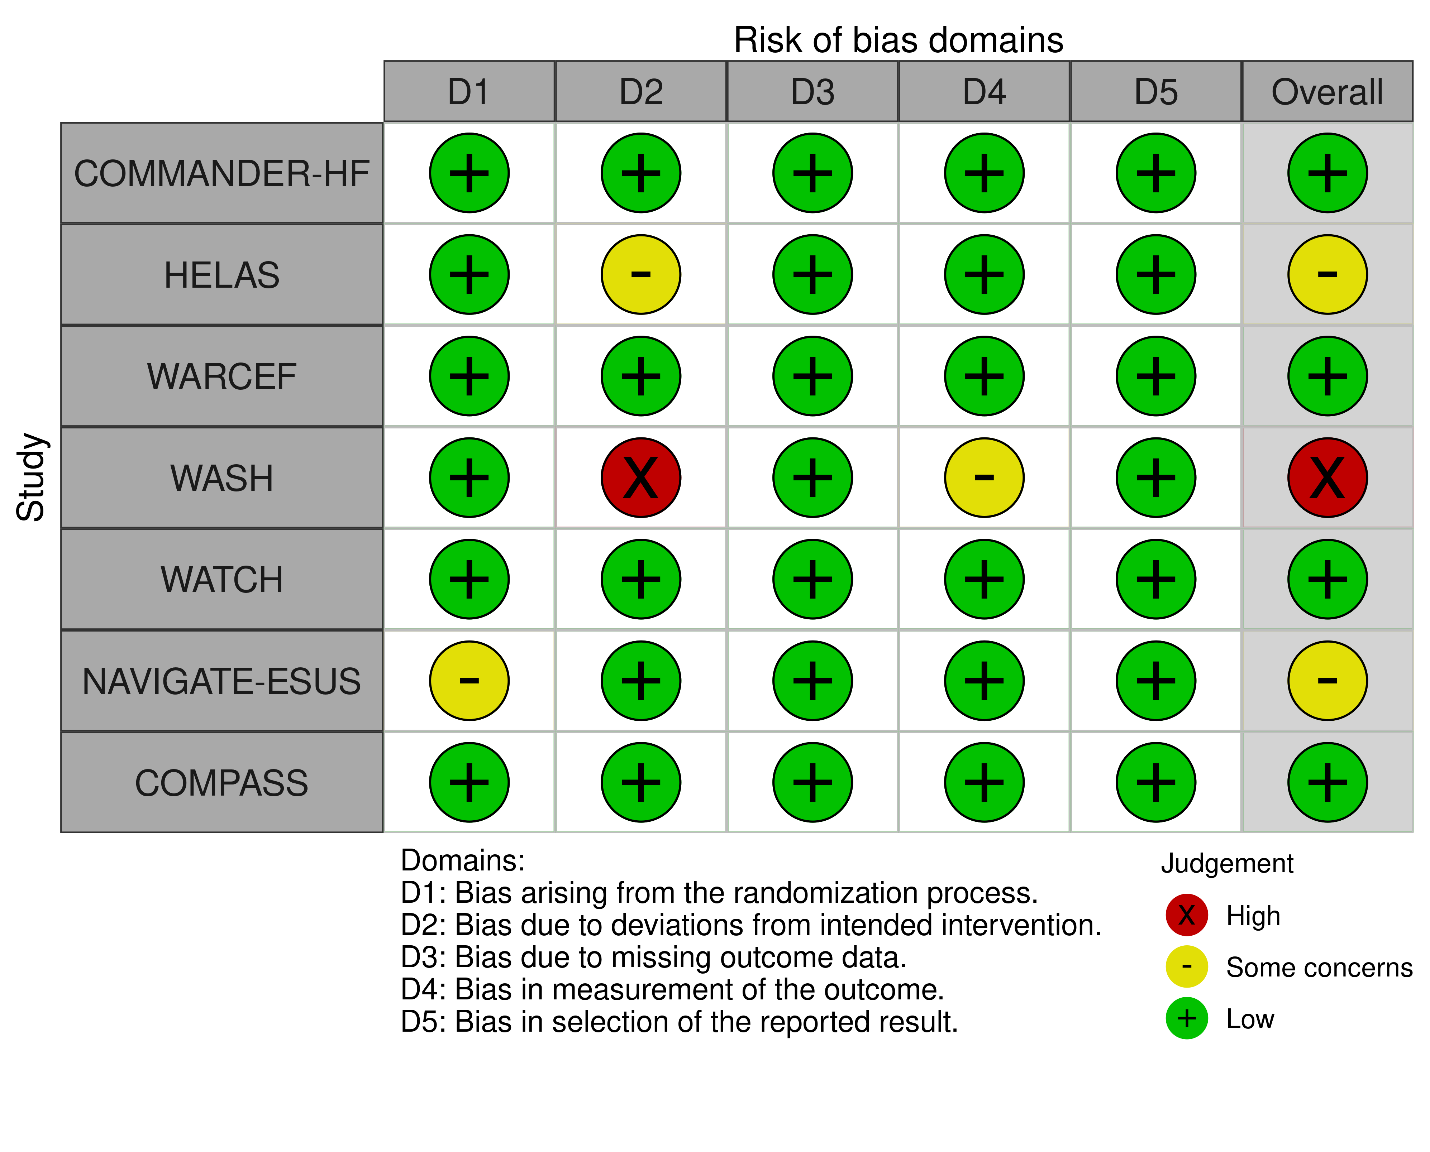


**Supplemental Figure 3. Publication bias of stroke/systemic embolism outcome.**

**
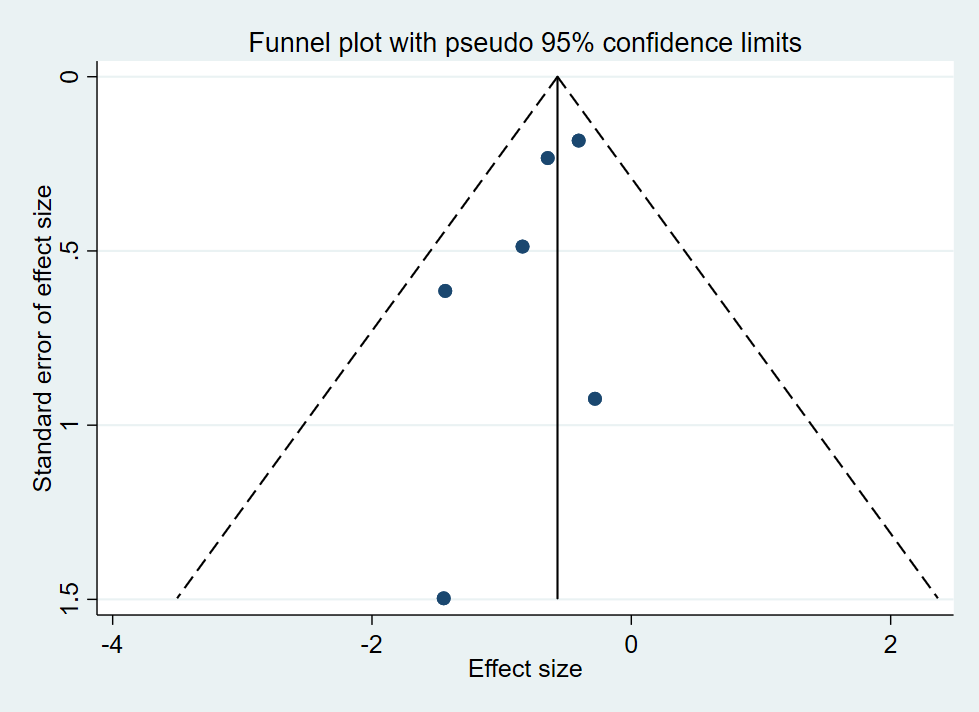
**

**Supplemental Figure 4.** **Publication bias of major bleeding.**

**
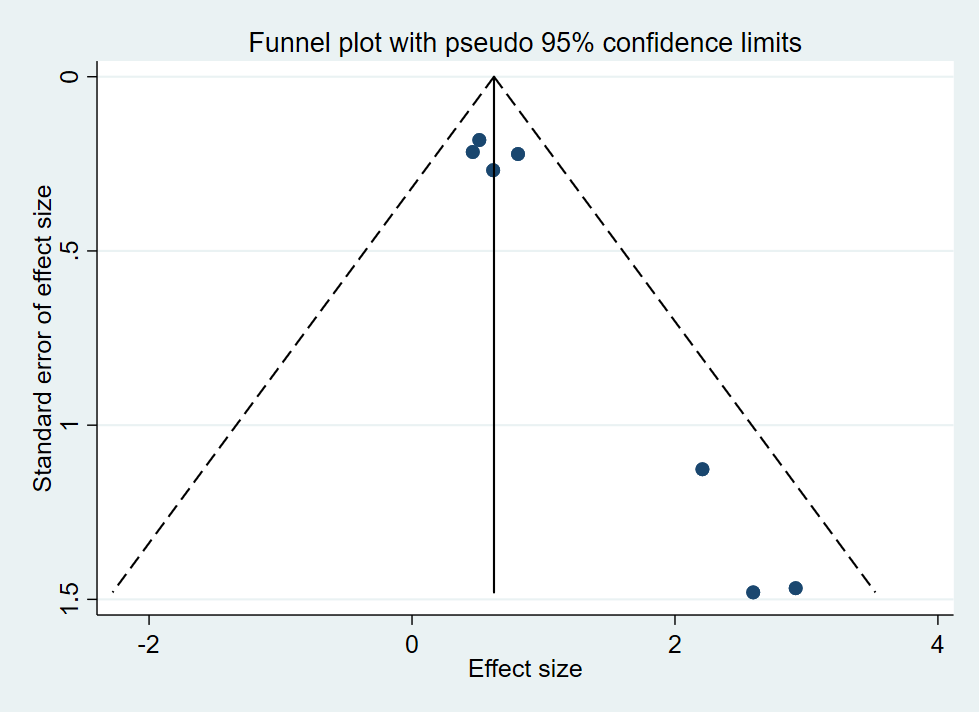
**

**Supplemental Figure 5.** **Pooled effect of oral anticoagulants versus antiplatelets or placebo regarding myocardial infarction.**

**
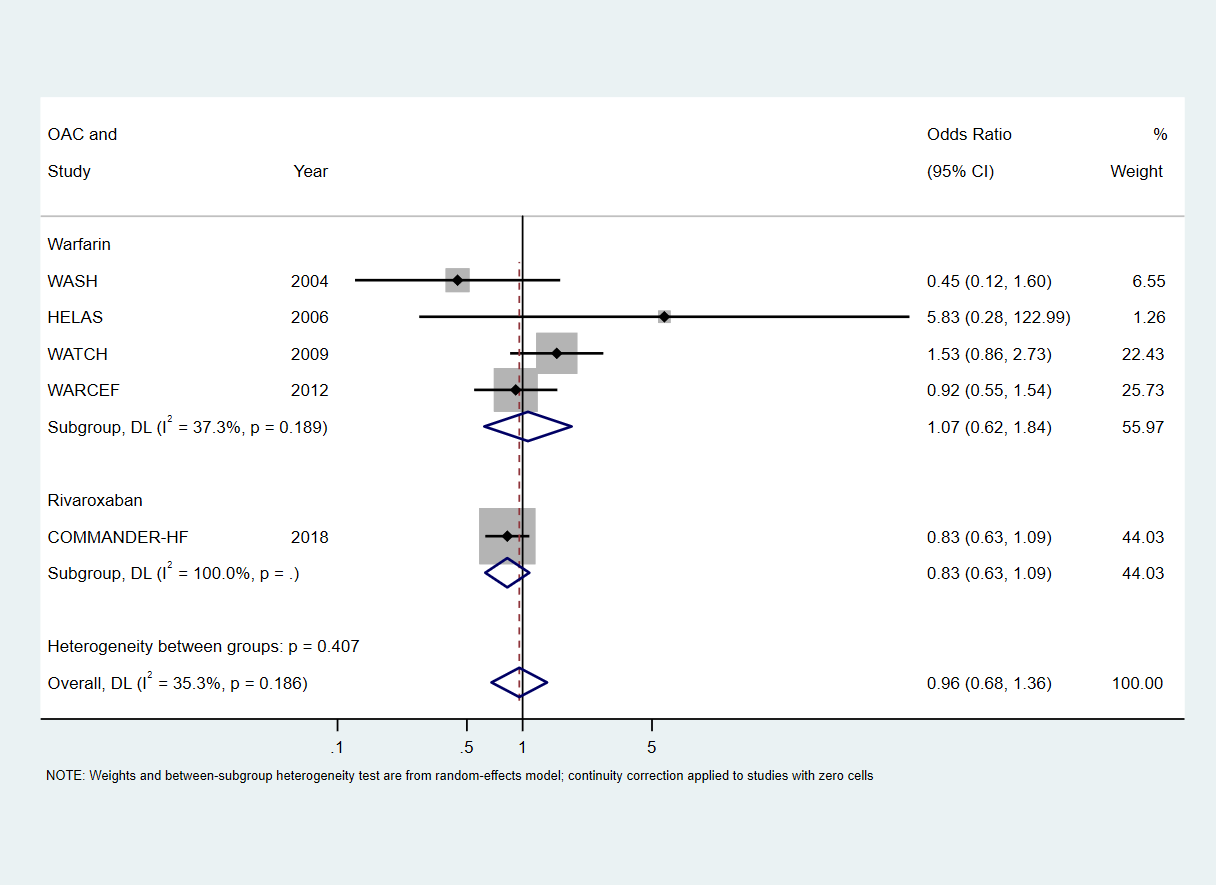
**

**Supplemental Figure 6. Pooled effect of oral anticoagulants versus antiplatelets or placebo regarding all-cause mortality.**

**
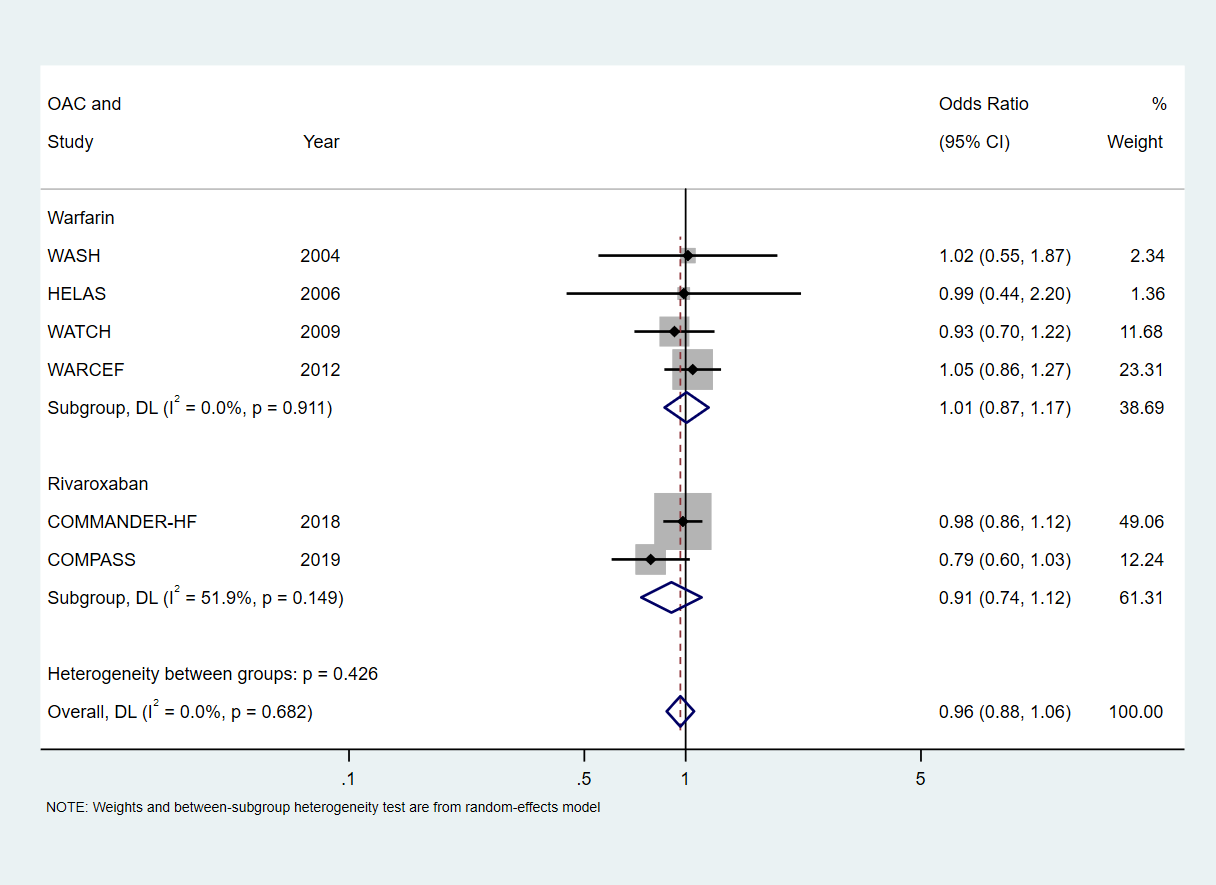
**

**Supplemental Figure 7.** **Pooled effect of oral anticoagulants versus antiplatelets or placebo regarding heart failure hospitalization.**

**
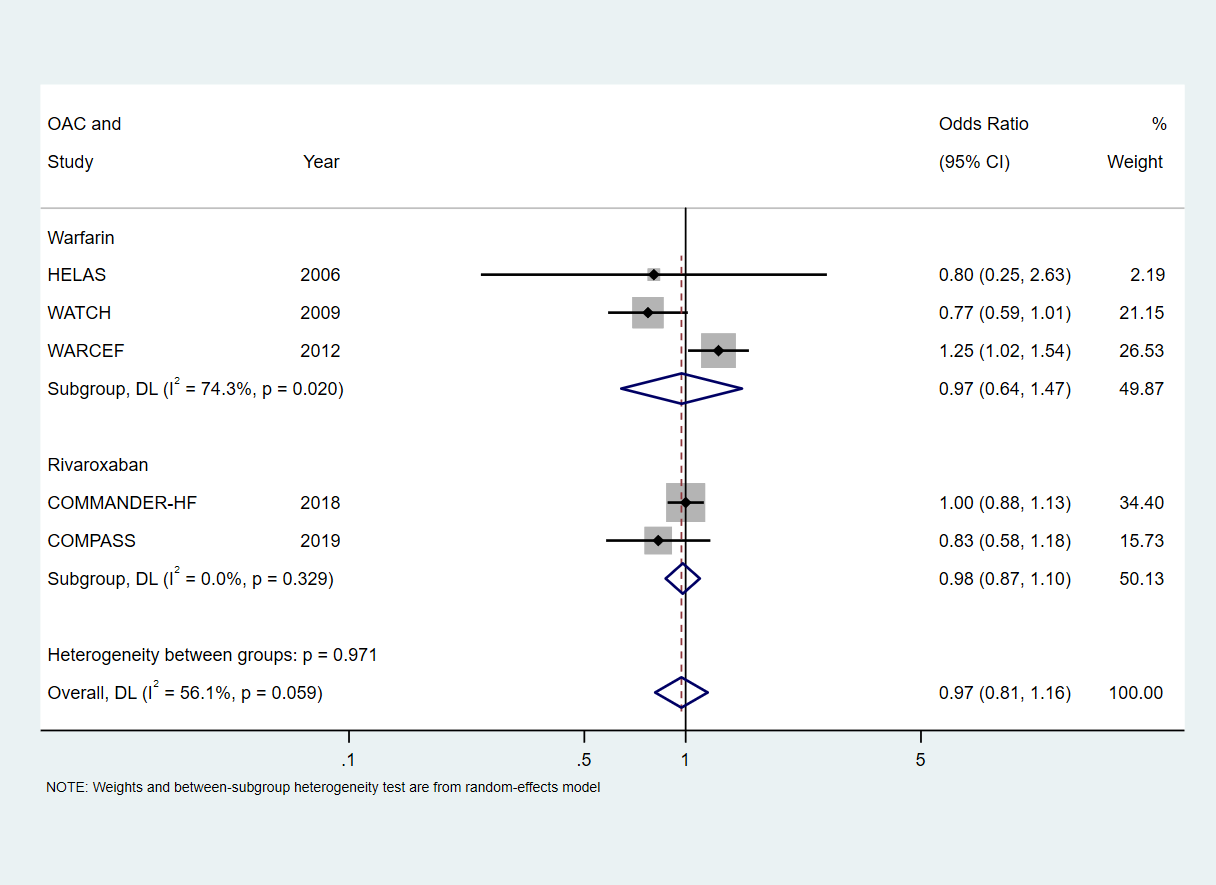
**

**Supplemental Figure 8.** **Pooled effect of oral anticoagulant versus antiplatelet for stroke/systemic embolism.**

**
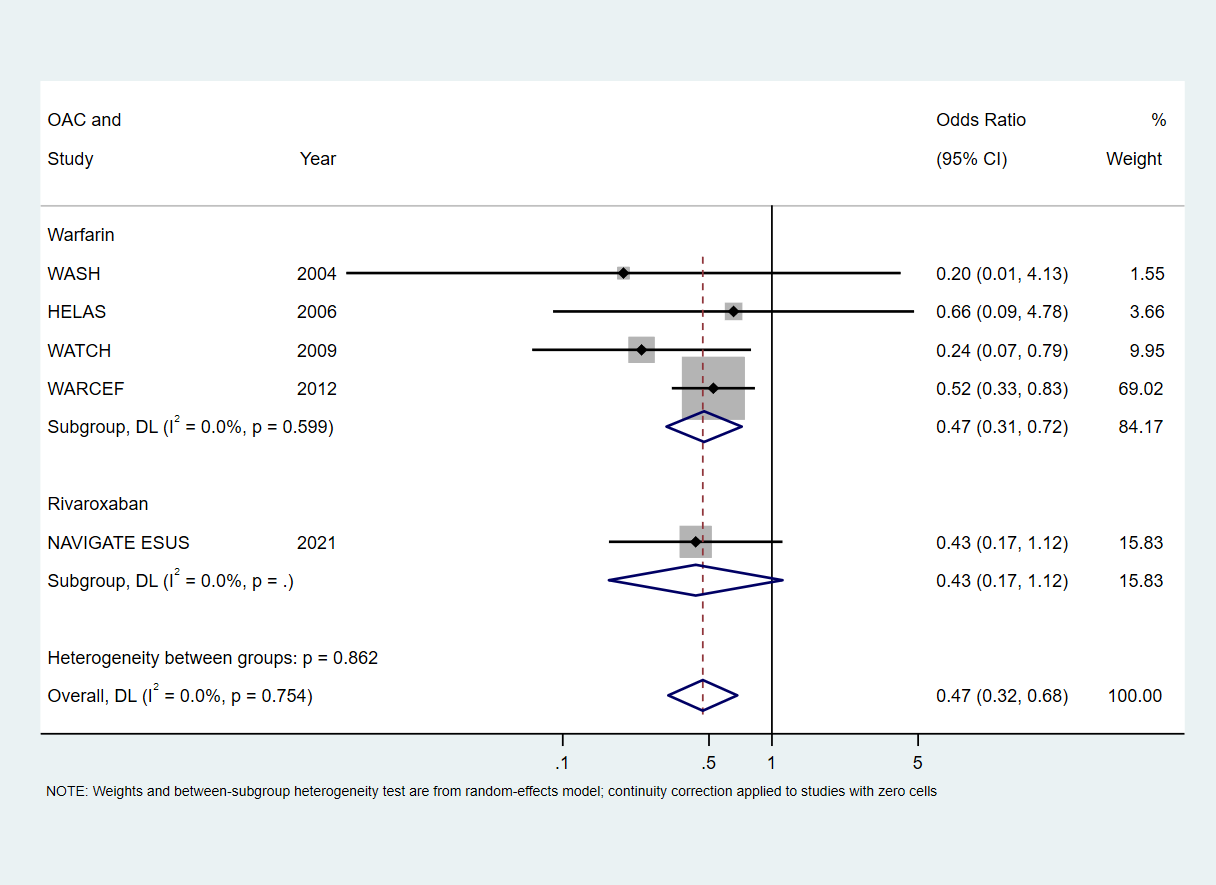
**

**Supplemental Figure 9. Pooled effect of oral anticoagulant versus antiplatelet for major bleeding.**

**
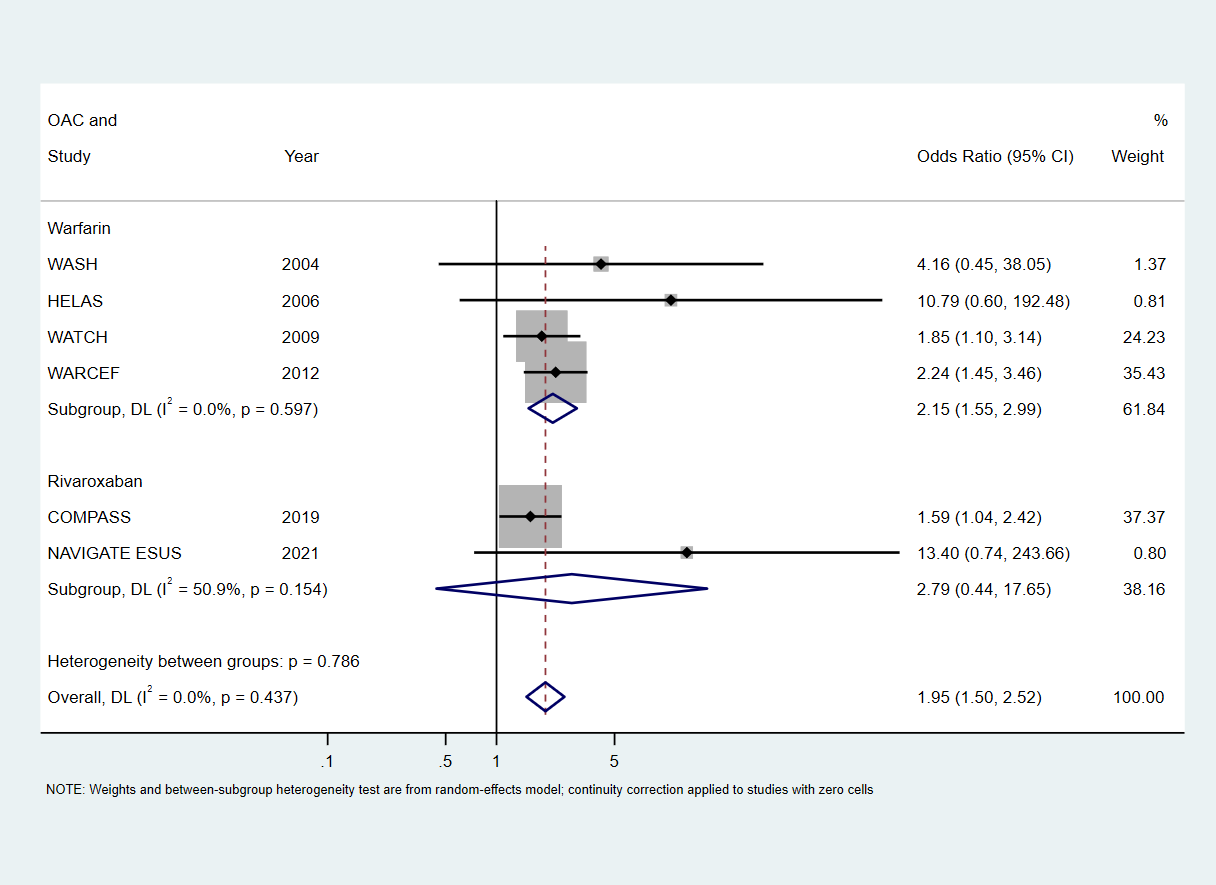
**

**Supplemental Figure 10. Leave-one-out analyses for stroke/systemic embolism outcome.**

**
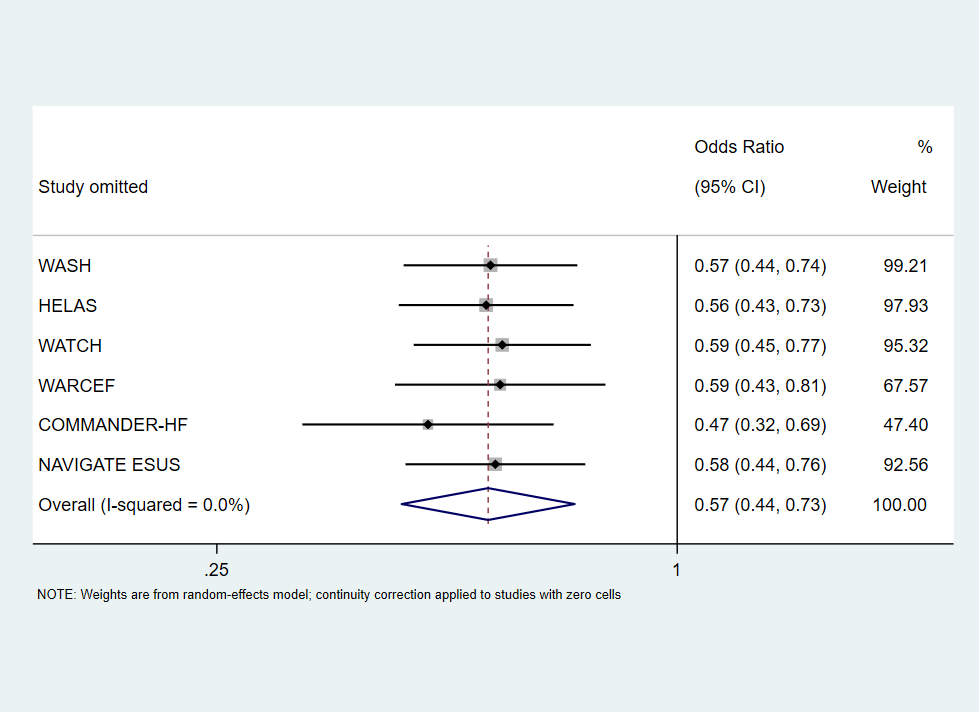
**

**Supplemental Figure 11. Leave-one-out analyses for major bleeding outcome.**

**
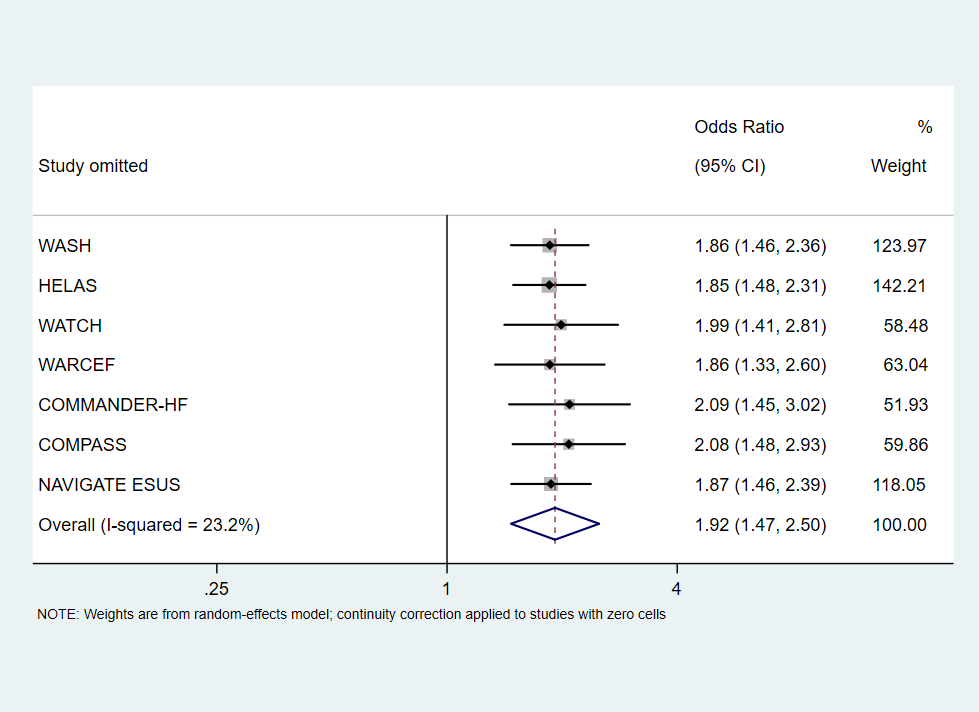
**

**Supplemental Table 1. Search terms and algorithm for PubMed and Embase databases.**

| Database | Query | Results |
| --- | --- | --- |
| PubMed | ((oral anticoagulant) OR (vitamin K antagonist) OR (warfarin) OR (acenocoumarol) OR (non vitamin K antagonist) OR (direct oral anticoagulant) OR (apixaban) OR (dabigatran) OR (edoxaban) OR (rivaroxaban) OR (novel oral anticoagulant)) AND ((heart failure) OR (systolic dysfunction) OR (diastolic dysfunction) OR (ventricular dysfunction)) AND ((antiplatelet) OR (aspirin) OR (clopidogrel) OR(placebo)) AND ((randomized controlled trial) OR (randomized clinical trial)) | 204 |
| Embase | ('oral anticoagulant':ti,ab,kw OR 'vitamin k antagonist':ti,ab,kw OR warfarin:ti,ab,kw OR acenocoumarol:ti,ab,kw OR 'non vitamin k antagonist':ti,ab,kw OR 'direct oral anticoagulant':ti,ab,kw OR apixaban:ti,ab,kw OR dabigatran:ti,ab,kw OR edoxaban:ti,ab,kw OR rivaroxaban:ti,ab,kw OR 'novel oral anticoagulant':ti,ab,kw) AND (heart AND failure OR (systolic AND dysfunction) OR (diastolic AND dysfunction) OR (ventricular AND dysfunction)) AND (antiplatelet OR aspirin OR clopidogrel OR placebo) AND [randomized controlled trial]/lim | 200 |
